# Supplementary material
Source: MDPI journal article supplement (https://www.mdpi.com/2227-7390/11/21/4481)
Supplement: s1 [file s1]

Supplementary Materials

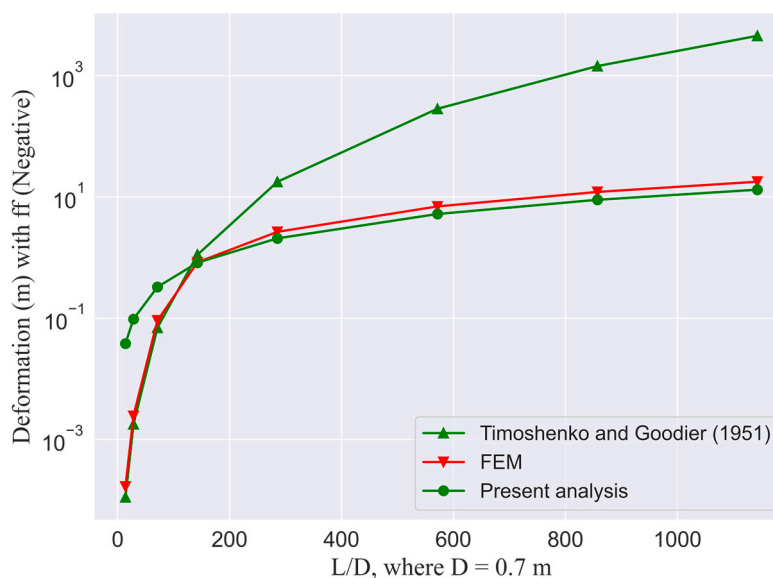

**Figure S1.** Comparisons of the static deformation of the free span submarine pipelines computed by the present analysis with the existing solutions for various  $\frac{L}{D}$ , where  $D = 0.7$  for fixed-fixed support.

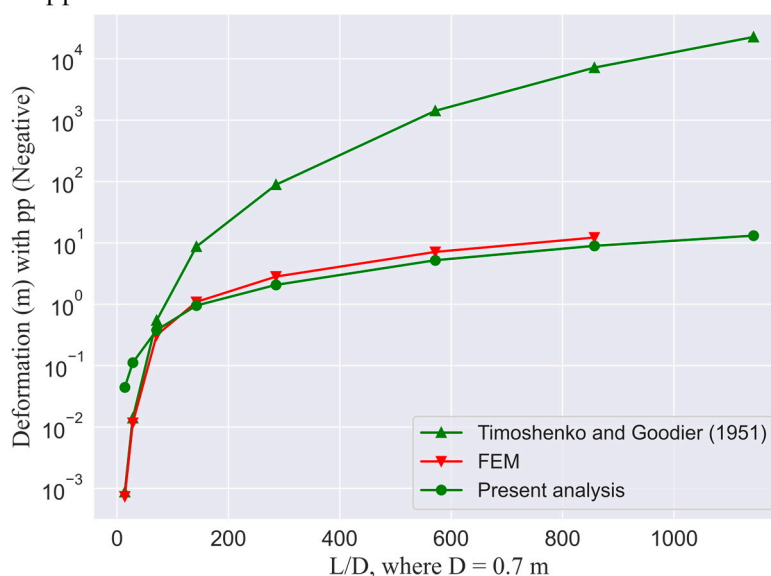

**Figure S2.** Comparisons of the static deformation of the free span submarine pipelines computed by the present analysis with the existing solutions for various  $\frac{L}{D}$ , where  $D = 0.7$  for pinned-pinned support.

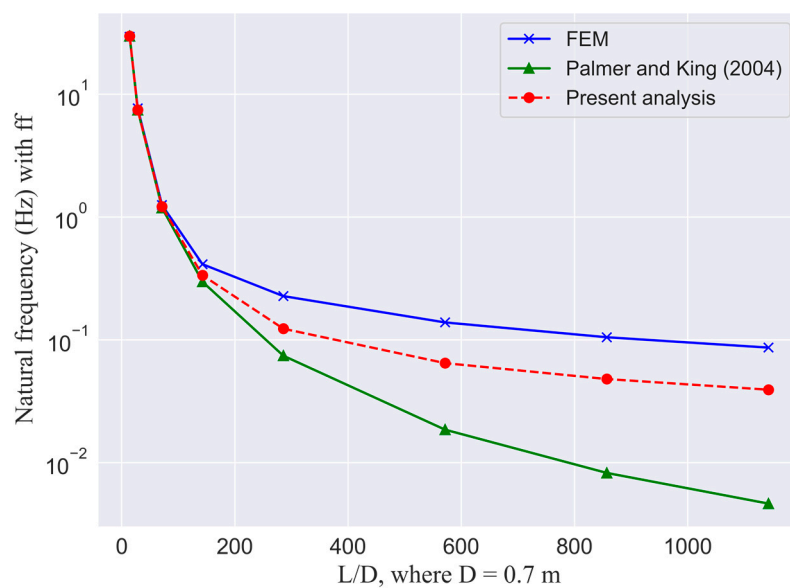

**Figure S3.** Comparisons of the natural frequency of the free span submarine pipelines computed by the present analysis with the existing solutions for various  $\frac{L}{D}$ , where  $D = 0.7$  for fixed-fixed support.

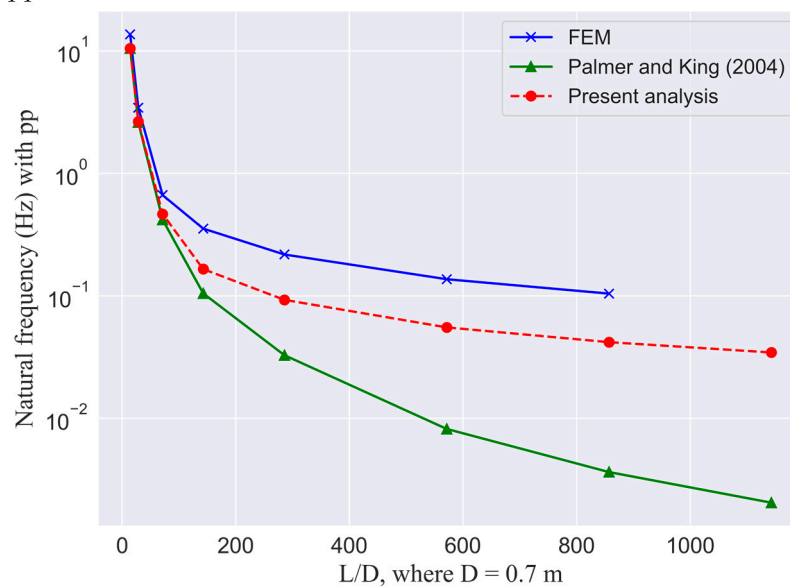

**Figure S4.** Comparisons of the natural frequency of the free span submarine pipelines computed by the present analysis with the existing solutions for various  $\frac{L}{D}$ , where  $D = 0.7$  for pinned-pinned support.
